# Supplementary material
Source: PubMed Central journal article supplement (PMC6640451)
Supplement: MPP-10-291-s003.pdf [file MPP-10-291-s003.pdf]

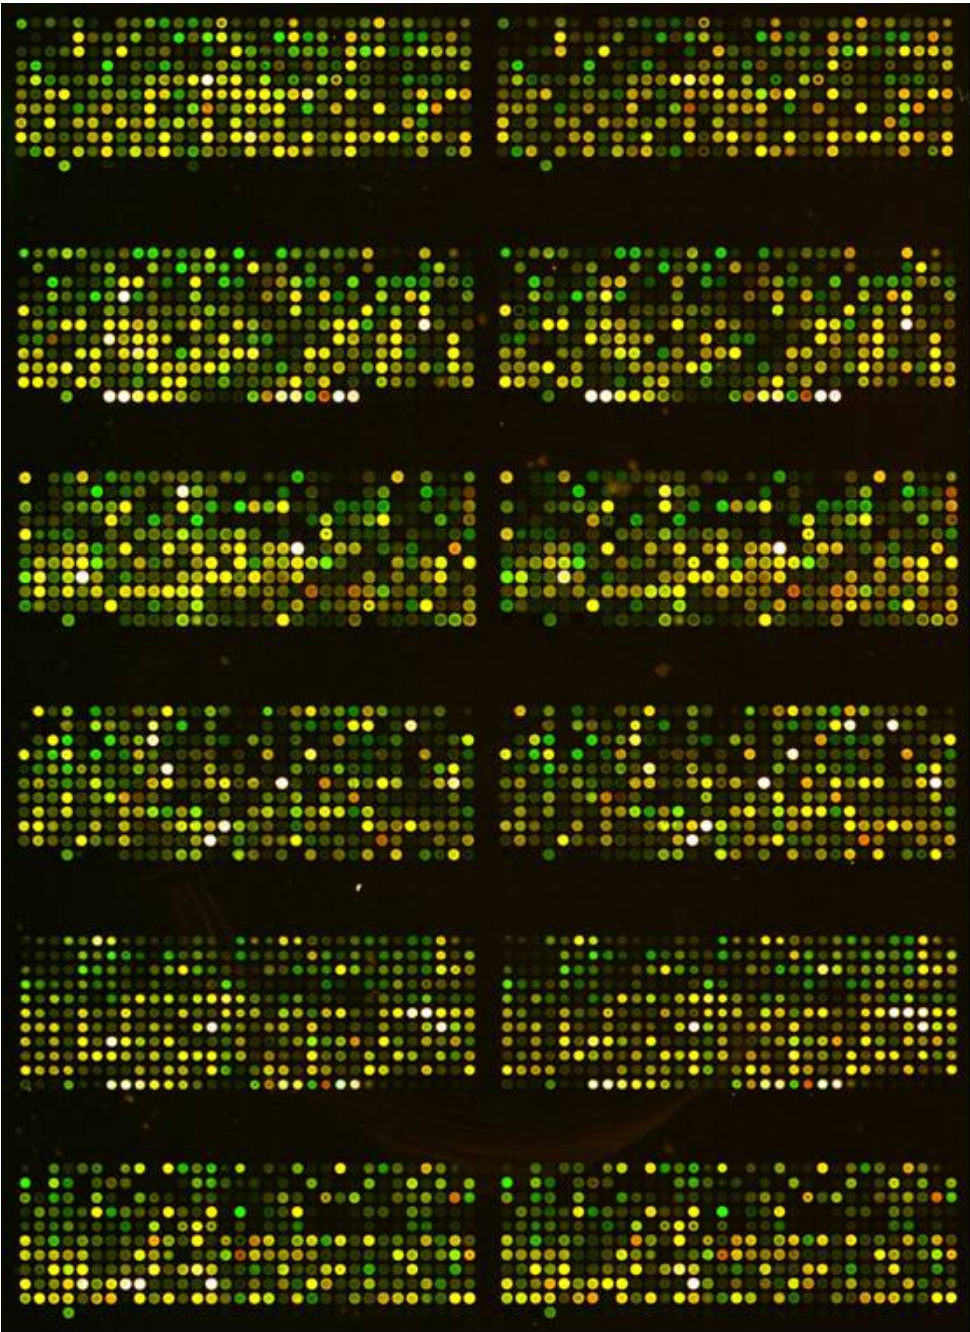

**Supplementary Figure 2** Example of a pearl millet microarray image following hybridisation with differentially labelled RNA samples, and scanning with a Genepix™ 4000B scanner (Axon instruments). In this particular example, RNA extracted from pearl millet plants 0 h post MeJA treatment was labelled with Cy™5 dye, and RNA isolated from plants 48 h post MeJA treatment was labelled with Cy™3 dye.
